# Supplementary material for: Nexus Between Carbon Emissions, Energy Consumption, Urbanization and Economic Growth in Asia: Evidence From Common Correlated Effects Mean Group Estimator (CCEMG)
Source: Frontiers journal article supplement (doi:10.3389/fenrg.2020.610577), 2021-02-18
Supplement: Table_1.DOCX [file Table_1.DOCX]

**Carbon Emissions, Energy Consumption, Urbanization and Economic Growth: Evidence from Asian Countries**

Yusuf Babatunde Adeneye1, Amar Hisham Jaaffar2, Chai Aun Ooi3 & Say Keat Ooi4*

1,4 Graduate School of Business, Universiti Sains Malaysia, 11800 Penang Malaysia.

2Institute of Energy Policy and Research, Universiti Tenaga Nasional, Malaysia.

3School of Economics, Finance and Banking, Universiti Utara Malaysia, 06010 Kedah Malaysia.

*Corresponding author, email: ooisaykeat@usm.my

**Abstract**

As the debate surrounds anthropogenic carbon emissions and climate change typifies sustainable development dilemma, the global climate effort put forward by the Paris Agreement advocates urgent attention towards carbon mitigation and adaptation strategies. While economic development is crucial for the emerging markets, it is noteworthy to assess the nexus between energy consumption, urbanization and carbon emission, especially from the Asian countries’ perspective. Hence, this study investigates the dynamic interactions between carbon emission, energy consumption, urbanization and economic growth using Fully Modified Ordinary Least Square (FMOLS), and Dynamic Ordinary Least Square (DOLS) methodologies in 42 Asian countries over the period from 2000 to 2014.The findings suggest positive long-run relationships between urbanization, energy consumption, carbon emission, and economic growth. Results show bi-directional relationships urbanization, energy consumption, carbon emission, and economic growth. However, it reveals a negative relationship between energy consumption to carbon emissions and urbanization, suggesting that on-going carbon taxation and energy prices in some Asian countries such as China and Singapore are yielding positive impacts in reducing urban population density, but with less mitigating effect on carbon emissions. This study finds evidence of cross-sectional dependence between carbon emissions, urbanization, energy consumption, and economic growth, suggesting several commonalities in Asia, including integrated financial systems, infrastructure development, trade, increasing level of tourists’ arrivals, and exposure to common geopolitical risks. Overall, these findings cast important implications on renewable energy policy and urban planning insights for the policymakers.

**Keywords**: Urbanization, energy consumption, carbon emissions, Asia countries, VECM causality, Fully Modified Ordinary Least Square (FMOLS), panel dynamic OLS.
